## Correction to: Standardized naming of microbiome samples in Genomes OnLine Database

This is a correction to: Supratim Mukherjee, Galina Ovchinnikova, Dimitri Stamatis, Cindy Tianqing Li, I-Min A Chen, Nikos C Kyrpides, T B K Reddy, Standardized naming of microbiome samples in Genomes OnLine Database, *Database*, Volume 2023, 2023, baad001, <https://doi.org/10.1093/database/baad001>

In the originally published version of this manuscript em dashes were inadvertently added in place of short dashes and

spaces, particularly in the canonical name of the database being described.

In addition to this changes have also been made to the formatting of Table 1 to aid understanding. No changes have been made to the content.

These errors, for which the publisher apologizes, have been corrected.
